# Supplementary material
Source: Springer Nature journal article supplement (https://www.springermedizin.de/resource/supplementary/12891_2007_386_MOESM1_ESM.pdf/9510932)
Supplement: MOESM1 [file 9510932]

Enrolment

**Assessed for eligibility (n=80)**

**Excluded (n=46)**

Not meeting inclusion criteria (n=16)  
Refused to participate (n=29)  
Other reasons (required urgent foot care  
n=1)

**Randomised (n=34)**

Allocation

**Allocated to podiatry intervention (n=16)**

Received allocated intervention (n=15)  
Did not receive allocated intervention (declined  
following allocation) (n=1)

**Allocated to non podiatry intervention (n=18)**

Received allocated intervention (n=16)  
Did not receive allocated intervention  
(declined following allocation, n=1,  
withdrew to seek immediate foot care, n=1)

Follow up

**Lost to follow-up (n=3)**

Self withdrawal (n=3)

**Lost to follow-up (n=4)**

Self withdrawal (n=3)  
Deceased (n=1)

Analysis

**Analysed (n=12)**

**Analysed (n=12)**
